# Methodological Underestimation of Oceanic Nitrogen Fixation Rates

Wiebke Mohr\*, Tobias Großkopf, Douglas W. R. Wallace, Julie LaRoche

Marine Biogeochemie, Leibniz-Institut für Meereswissenschaften (IFM-GEOMAR), Kiel, Germany

## Abstract

The two commonly applied methods to assess dinitrogen ( $N_2$ ) fixation rates are the  $^{15}N_2$ -tracer addition and the acetylene reduction assay (ARA). Discrepancies between the two methods as well as inconsistencies between  $N_2$  fixation rates and biomass/growth rates in culture experiments have been attributed to variable excretion of recently fixed  $N_2$ . Here we demonstrate that the  $^{15}N_2$ -tracer addition method underestimates  $N_2$  fixation rates significantly when the  $^{15}N_2$  tracer is introduced as a gas bubble. The injected  $^{15}N_2$  gas bubble does not attain equilibrium with the surrounding water leading to a  $^{15}N_2$  concentration lower than assumed by the method used to calculate  $^{15}N_2$ -fixation rates. The resulting magnitude of underestimation varies with the incubation time, to a lesser extent on the amount of injected gas and is sensitive to the timing of the bubble injection relative to diel  $N_2$  fixation patterns. Here, we propose and test a modified  $^{15}N_2$  tracer method based on the addition of  $^{15}N_2$ -enriched seawater that provides an instantaneous, constant enrichment and allows more accurate calculation of  $N_2$  fixation rates for both field and laboratory studies. We hypothesise that application of  $N_2$  fixation measurements using this modified method will significantly reduce the apparent imbalances in the oceanic fixed-nitrogen budget.

**Citation:** Mohr W, Großkopf T, Wallace DWR, LaRoche J (2010) Methodological Underestimation of Oceanic Nitrogen Fixation Rates. PLoS ONE 5(9): e12583. doi:10.1371/journal.pone.0012583

**Editor:** Zoe Finkel, Mt. Alison University, Canada

**Received:** July 2, 2010; **Accepted:** August 11, 2010; **Published:** September 3, 2010

**Copyright:** © 2010 Mohr et al. This is an open-access article distributed under the terms of the Creative Commons Attribution License, which permits unrestricted use, distribution, and reproduction in any medium, provided the original author and source are credited.

**Funding:** This work is a contribution of the Collaborative Research Centre 754 "Climate - Biogeochemistry Interactions in the Tropical Ocean" ([www.sfb754.de](http://www.sfb754.de)), which is supported by the German Research Association. The funders had no role in study design, data collection and analysis, decision to publish, or preparation of the manuscript.

**Competing Interests:** The authors have declared that no competing interests exist.

\* E-mail: [wmohr@ifm-geomar.de](mailto:wmohr@ifm-geomar.de)

## Introduction

Biological dinitrogen ( $N_2$ ) fixation is the major source of fixed nitrogen (N) in the oceanic N budget [1]. Current estimates of global oceanic  $N_2$  fixation are  $\sim 100\text{--}200 \text{ Tg N a}^{-1}$  [2].  $N_2$  fixation rates can be assessed through geochemical estimates, modelling of diazotroph abundances and growth rates [3] and direct measurements of  $N_2$  fixation. Geochemical estimates rely on the measurement of, e.g., nutrient stoichiometry and estimates or models of ocean circulation [4,5] or the distribution of stable isotope abundances (e.g., [6]). Direct measurements of  $N_2$  fixation are obtained either using the  $^{15}N_2$ -tracer addition method [7,8] or the acetylene reduction assay (ARA) [8,9]. However, direct measurements of  $N_2$  fixation rates account for  $\leq 50\%$  of the geochemically-derived estimates [10]. Furthermore, the sink terms in the oceanic fixed N budget significantly exceed the current estimates of  $N_2$  fixation and other source terms for fixed N [11,12]. This gap between sources and sinks of fixed N implies an oceanic nitrogen imbalance, which may reflect a non-steady-state of the oceanic fixed-N inventory, or result from over-estimation of loss processes and/or under-estimation of fixed nitrogen inputs [10,13]. However, isotopic signatures in sediments suggest that the fixed N budget is in a steady-state [14].

The comparison of  $N_2$  fixation rates measured simultaneously using the  $^{15}N_2$ -tracer addition and the ARA shows that the  $^{15}N_2$ -tracer addition generally yields lower rates (for a summary see [15]). In addition, mass balance analyses of  $^{15}N_2$ -based  $N_2$  fixation rates measured in experiments with cultured diazotrophs, indicate

that the  $^{15}N_2$ -tracer addition method yields rates that are too low for sustaining the observed growth rates and biomass [16,17]. The discrepancies between the two methods and the lack of mass balance in culture experiments have often been attributed to the excretion of recently fixed nitrogen as ammonium ( $NH_4^+$ ) or dissolved organic nitrogen (DON). The discrepancies have led to the operational definition of gross and net  $N_2$  fixation [16,18] as measured by the ARA and the  $^{15}N_2$ -tracer addition approaches, respectively. However, the measured release of  $NH_4^+$  or DON is rarely sufficient to balance the observed growth in culture, and even invoking recycling of the dissolved fixed N rarely accounts for the observed discrepancies between  $N_2$  fixation rate and growth rate/biomass [16].

The apparent oceanic N imbalance, differences between geochemical estimates and measured rates of  $N_2$  fixation, and the difficulties in reconciling discrepancies between ARA and  $^{15}N_2$ -based estimates of  $N_2$  fixation in the field and in culture experiments, led us to re-assess the  $^{15}N_2$ -tracer addition method. This method is based on the direct injection of a  $^{15}N_2$  gas bubble into a seawater sample [7] sufficient to yield a final enrichment of 2–5 atom percent (atom%) and incubation for 2–36 hours [19].  $N_2$  fixation rates are then retrieved from the incorporation of  $^{15}N_2$  into the particulate organic nitrogen (PON). The method assumes implicitly that the injected gas fully and rapidly equilibrates with the surrounding water, and this assumption is the basis for calculation of the initial  $^{15}N$  enrichment of the dissolved  $N_2$  pool. Knowledge of this enrichment is pivotal to the calculation of  $N_2$  fixation rates with this method as seen in equation 1 (equations

combined from [8]):

$$N_2 \text{ fixation rate} = \frac{(A_{PN}^{final} - A_{PN}^{t=0})}{(A_{N_2} - A_{PN}^{t=0})} \times \frac{[PN]}{\Delta t}$$

where A = atom% <sup>15</sup>N in the particulate organic nitrogen (PN) at the end (*final*) or beginning (*t=0*) of the incubation or in the dissolved N<sub>2</sub> pool (N<sub>2</sub>).

In applications of the method, all parameters of the equation are measured except for the atom% <sup>15</sup>N in the dissolved N<sub>2</sub> pool (A<sub>N<sub>2</sub></sub>). Equation 1 shows that calculation of N<sub>2</sub> fixation rates depends strongly on this value which is calculated from the predicted equilibrium dissolved N<sub>2</sub> concentration [20,21], its natural <sup>15</sup>N abundance, and the amount of <sup>15</sup>N<sub>2</sub> tracer added with the bubble. The calculation assumes that there is complete isotopic equilibration between the injected bubble of <sup>15</sup>N<sub>2</sub> and the surrounding water at the start of the incubation.

Here we report results of experiments that were designed to assess the rate of equilibration of an introduced <sup>15</sup>N<sub>2</sub> gas bubble with the surrounding water. Based on results of these experiments, we developed a modified approach involving addition of <sup>15</sup>N<sub>2</sub>-enriched seawater which assured a well-defined and constant <sup>15</sup>N enrichment of the dissolved N<sub>2</sub> gas at the beginning of the incubations. We propose the application of the modified approach for future assessments of N<sub>2</sub> fixation rates in natural microbial communities and in laboratory cultures.

## Results

### Time-resolved equilibration of a bubble of <sup>15</sup>N<sub>2</sub> in seawater

A first set of experiments (isotopic equilibration experiments) was carried out to assess the time required to attain isotopic equilibrium in the dissolved pool of N<sub>2</sub> gas after injection of a known amount of <sup>15</sup>N<sub>2</sub> gas as a bubble into sterile filtered seawater. A gas bubble of pure <sup>15</sup>N<sub>2</sub> was injected directly into incubation bottles which were manually inverted fifty-times (~3 min agitation) and left standing for up to 24 h. Concentration of dissolved <sup>15</sup>N<sub>2</sub> was followed over the 24 h period to assess the degree of equilibration of the <sup>15</sup>N<sub>2</sub> gas bubble with the surrounding water as a function of time. Dissolved <sup>15</sup>N<sub>2</sub> concentrations in the seawater increased steadily with the incubation time (Fig. 1A). After eight hours, dissolved <sup>15</sup>N<sub>2</sub> concentrations reached about 50% of the concentration calculated assuming complete isotopic equilibration of the injected bubble with the ambient dissolved N<sub>2</sub> gas in the seawater sample. At the end of the 24 h incubation, the dissolved <sup>15</sup>N<sub>2</sub> concentration had increased to about 75% of the calculated concentration.

### N<sub>2</sub> fixation rate underestimation due to incomplete <sup>15</sup>N<sub>2</sub> gas bubble equilibration

Similar results were obtained in the incubation experiments with pure culture of *Crocospaera watsonii* (culture experiments), which confirmed the incomplete and time-dependent equilibration of the injected bubble of <sup>15</sup>N<sub>2</sub> gas with the surrounding water (Fig. 1B). These experiments also demonstrated the associated underestimation of N<sub>2</sub> fixation rates. Culture experiments were conducted after <sup>15</sup>N<sub>2</sub> addition as a gas bubble and also after <sup>15</sup>N<sub>2</sub> addition in the form of <sup>15</sup>N<sub>2</sub>-enriched seawater (our modified method, see Methods section). The incubation of *C. watsonii* after injection of a bubble of <sup>15</sup>N<sub>2</sub> gas and without prior incubation of this bubble in algal-free media, gave a N<sub>2</sub> fixation rate which was

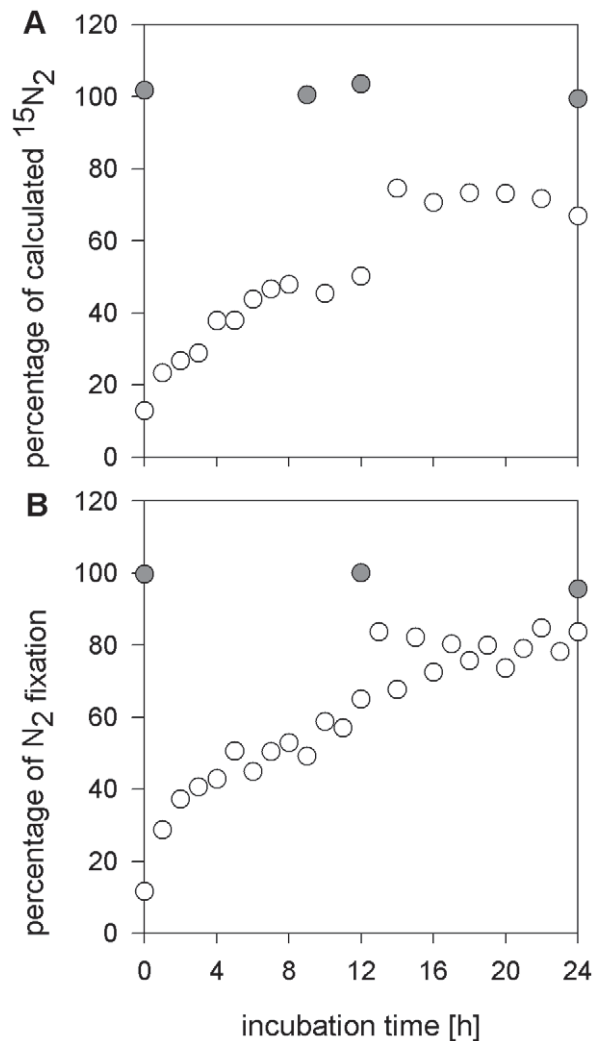

**Figure 1. Time-dependence of the equilibration of a <sup>15</sup>N<sub>2</sub> gas bubble with seawater.** Results are presented as a function of the time after bubble injection (white symbols). (A) Measured dissolved <sup>15</sup>N<sub>2</sub> concentrations as percentage of calculated concentration assuming rapid and complete isotopic equilibrium. (B) N<sub>2</sub> fixation rates by *C. watsonii* as percentage of the maximum rate measured during the experiments. For comparison, the addition of <sup>15</sup>N<sub>2</sub>-enriched water to samples yielded a constant <sup>15</sup>N<sub>2</sub> enrichment over 24 h (A, grey symbols) or constant N<sub>2</sub> fixation rates (B, grey symbols). doi:10.1371/journal.pone.0012583.g001

only 40% of the maximum rate measured in the incubations to which <sup>15</sup>N<sub>2</sub>-enriched seawater had been added. In other words, for the 12-h incubation period under the described experimental conditions, the N<sub>2</sub> fixation rate was underestimated by 60% when the <sup>15</sup>N<sub>2</sub> was introduced as a gas bubble. In contrast, in both the isotopic equilibration and the culture experiments, the concentration of dissolved <sup>15</sup>N<sub>2</sub> remained stable at the predicted value throughout the 24 h in incubations to which <sup>15</sup>N<sub>2</sub>-enriched water was added.

### Factors influencing <sup>15</sup>N<sub>2</sub> gas dissolution in N<sub>2</sub>-saturated seawater

Continuous, vigorous shaking (50 rpm) greatly increased the concentration of <sup>15</sup>N<sub>2</sub> in the media (Fig. 2) reaching ~67% of the calculated concentration after 30 minutes whereas the initial, manual agitation, *i.e.* inverting bottles 50 times (~3 min), resulted

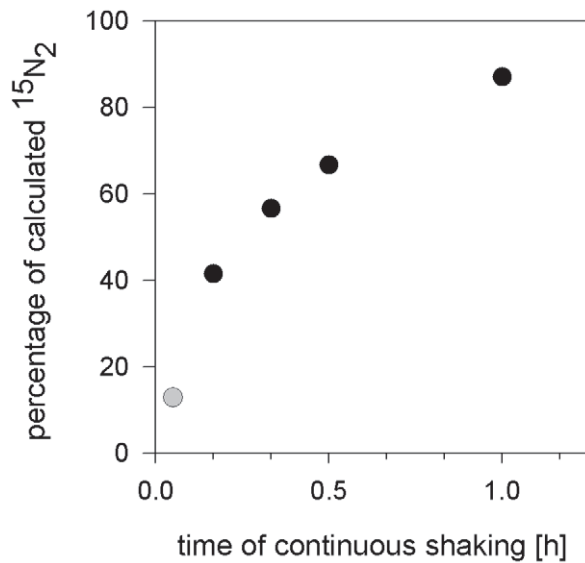

**Figure 2. Agitation-dependent increase in dissolved <sup>15</sup>N<sub>2</sub> using bubble incubations.** Values are presented as a percentage of the calculated concentration. The manually-shaken (3 min) sample was added to the plot for comparison (grey symbol). doi:10.1371/journal.pone.0012583.g002

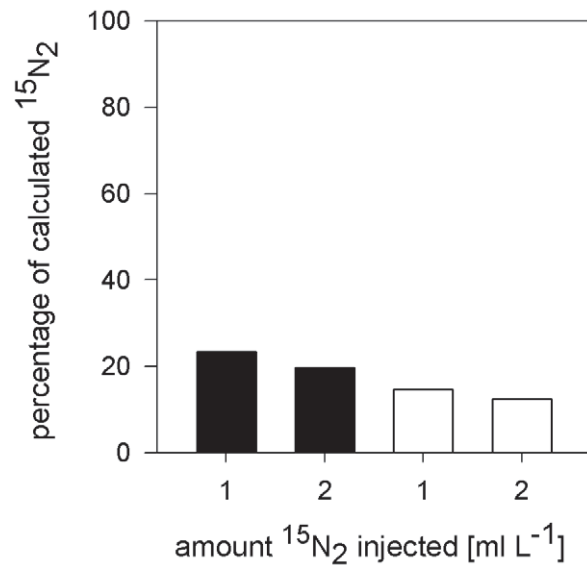

**Figure 3. Dissolved <sup>15</sup>N<sub>2</sub> concentration as a function of bottle size and amount of injected <sup>15</sup>N<sub>2</sub> gas.** Values are presented as a percentage of the calculated concentration. Bottles were incubated for 1 hour. Black bars, 0.13 L bottle and white bars, 1.15 L bottle. doi:10.1371/journal.pone.0012583.g003

in only ~13% of the calculated concentration. Information on agitation is generally not provided in the published literature, but this is clearly a variable factor in incubations, especially if performed at sea. Continuous, vigorous shaking, as tested here (50 rpm; Fig. 2), is difficult to achieve in field experiments and may, in addition, be detrimental to some diazotrophs (e.g. *Trichodesmium* colonies).

Increasing the size of the incubation bottles, increasing the amount of gas injected per liter of seawater and the addition of dissolved organic matter (DOM) led in all cases except one to slower equilibration of the <sup>15</sup>N<sub>2</sub> gas bubble with the surrounding water (Fig. 3 and 4A), even when bottles were shaken continuously for one hour (Fig. 4B). Only with the injection of 8 ml of <sup>15</sup>N<sub>2</sub> gas per liter of water and one hour of continuous, vigorous shaking, was near-complete equilibration achieved (97% of calculated concentration).

## Discussion

Both the isotopic equilibration and the culture experiments demonstrated clearly that the equilibration of <sup>15</sup>N<sub>2</sub> gas injected as a bubble into N<sub>2</sub>-saturated seawater is time-dependent and incomplete, even after 24 hours. The lack of complete equilibration causes the resulting calculated N<sub>2</sub> fixation rates to be variably and significantly underestimated (see Equation 1). The equilibration, i.e. the isotopic exchange between the <sup>15</sup>N<sub>2</sub> gas in the bubble and the surrounding water is controlled primarily by diffusive processes. The major variables that influence the rate of isotopic exchange include the surface area to volume ratio of the bubble, the characteristics of the organic coating on the bubble surface [22], temperature and the rate of renewal of the water-bubble interface [23]. The renewal of the water-bubble interface appears to have the greatest effect on the isotopic exchange, as continuous vigorous shaking of the incubation bottles generated the highest enrichment of <sup>15</sup>N<sub>2</sub> in the water phase. However, the calculated (equilibrium) enrichment in <sup>15</sup>N<sub>2</sub> was not attained fully even after one-hour of continuous shaking at 50 rpm on a rotary shaker.

Incubations carried out on board a research vessel will provide some agitation of the bubble but this will not approach the high and constant agitation tested in our experiments. The implication is that variable sea-state conditions encountered during sea-going incubations, and the details of individual experiments, will lead to variable <sup>15</sup>N<sub>2</sub> enrichments and hence variable underestimation of N<sub>2</sub> fixation rates. Further, N<sub>2</sub> fixation studies in the oligotrophic regions of the ocean usually require the use of large incubation volumes (e.g., 2–4 L), so that continuous shaking for one hour or more is not practical, and in addition would likely be detrimental to the natural microbial communities.

The experiments with variable bottle sizes and DOM additions (Fig. 3 and 4) demonstrated that there are factors in addition to the bubble incubation time that affect the equilibration. On the other hand, the addition of <sup>15</sup>N<sub>2</sub>-enriched seawater to the incubations led to a stable enrichment over the 24 h incubation time which was instantaneous and independent of the agitation of the bottles.

This study was motivated partly by the mismatches between the ARA and <sup>15</sup>N<sub>2</sub>-based measurements of N<sub>2</sub> fixation as well as imbalances between <sup>15</sup>N<sub>2</sub>-fixation rates and biomass-specific rates (~growth rate) or C:N fixation ratios (Table 1). Such mismatches have been observed in environmental studies and in culture studies, mainly with *Trichodesmium*. Although it has been shown that *Trichodesmium* can excrete recently fixed N<sub>2</sub> as NH<sub>4</sub><sup>+</sup> or DON [16,24], the excretion of <sup>15</sup>NH<sub>4</sub><sup>+</sup> or DO<sup>15</sup>N rarely accounts for the observed discrepancies [16,17]. The operational definition of gross and net N<sub>2</sub> fixation as obtained through ARA and <sup>15</sup>N<sub>2</sub> incubations, respectively, has been mainly based on the mismatch between the rates measured by the two methods. Our results demonstrate that N<sub>2</sub> fixation rates, as measured with the <sup>15</sup>N<sub>2</sub> method [7] are underestimated. Therefore, the magnitude of the exudation of recently fixed nitrogen and the conditions promoting this process should be re-evaluated, taking into account the results presented here.

We reviewed published studies that have used the direct injection of a <sup>15</sup>N<sub>2</sub> gas bubble to assess N<sub>2</sub> fixation rates in order to

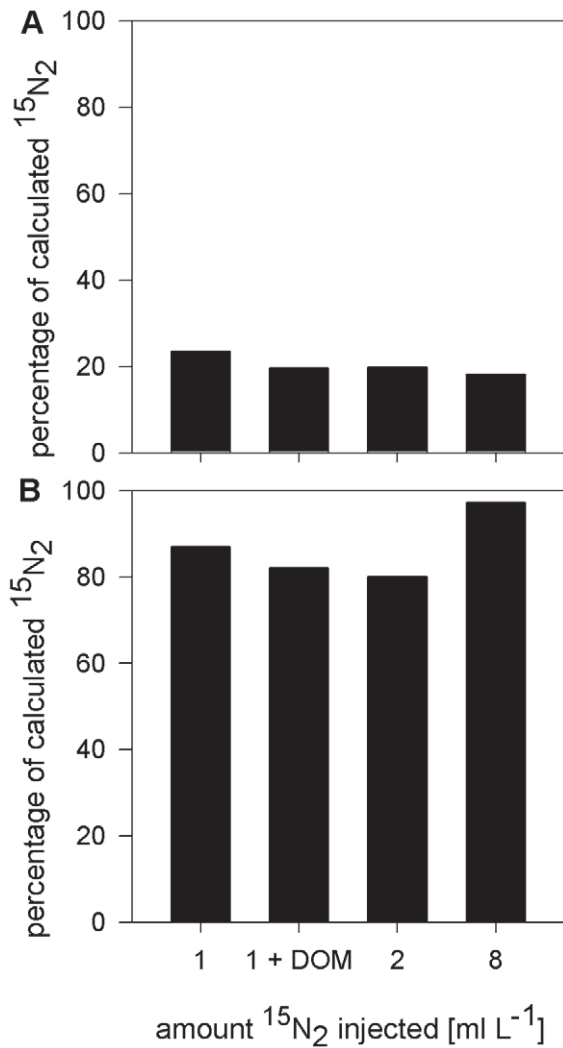

**Figure 4. Dissolved <sup>15</sup>N<sub>2</sub> concentration as a function of the amount of injected gas and agitation.** Values are presented as a percentage of the calculated concentration (A) after 1 hour incubation in manually (3 min shaking and 1 h subsequent incubation), and (B) in continuously (1 h) shaken samples.  
doi:10.1371/journal.pone.0012583.g004

evaluate the magnitude of under-estimation. However, first attempts to assess the degree of underestimation of field and culture N<sub>2</sub> fixation rates were obscured by a wide range of experimental conditions among the studies. Bottle sizes ranged from 14 ml to 10 L, the amount of <sup>15</sup>N<sub>2</sub> injected varied from 0.2 to 40.8 ml <sup>15</sup>N<sub>2</sub> per L seawater and incubation times ranged from 0.25 to 48 hours, with the majority of the field studies using 2–4 L bottles and 24 h incubations. In addition, information on agitation was, in general, not available. There were no obvious trends of reported N<sub>2</sub> fixation rates with either bottle size, incubation time or the amount of injected <sup>15</sup>N<sub>2</sub> gas probably because of the large variability of geographic locations and environmental conditions prevailing in the individual studies, which would have a dominant effect on the local diazotrophic communities and their N<sub>2</sub> fixation rates. An evaluation of the degree of possible underestimation of <sup>15</sup>N<sub>2</sub> fixation rates in environmental studies is further confounded by diel periodicity of N<sub>2</sub> fixation [25–27]. The lack of knowledge on the exact timing and magnitude of the individual N<sub>2</sub> fixation activity of the different diazotrophs relative to the timing of <sup>15</sup>N<sub>2</sub> gas injection hinders back-calculation of published N<sub>2</sub> fixation data. This can be illustrated, for example, with a hypothetical diazotroph community that is dominated by unicellular cyanobacteria which fix nitrogen during the night period only (Fig. 5A). In this microbial community, measurements of N<sub>2</sub> fixation using the direct injection of a <sup>15</sup>N<sub>2</sub> gas bubble during a 24 hour incubation will lead to a variable underestimation of the true N<sub>2</sub> fixation rate, depending on the timing of the incubation start relative to the peak in the nitrogenase activity (Fig. 5C, solid lines). The underestimation will be more pronounced if the start of the incubation is coincident with the onset of the active N<sub>2</sub> fixation period. In contrast, incubations with enriched <sup>15</sup>N<sub>2</sub> seawater, will not lead to an underestimate, regardless of the incubation start relative to the diel cycle (Fig. 5C, dashed lines).

The discrepancies and mismatches/imbalances observed in field and laboratory studies could, in part, be explained by the variable underestimation of the true N<sub>2</sub> fixation rate due to the methodological uncertainty reported here. We propose the addition of <sup>15</sup>N<sub>2</sub>-enriched seawater to incubations to assess N<sub>2</sub> fixation rates in laboratory and field studies. We suggest that measurements using this approach are likely to increase measurements and estimates of N<sub>2</sub> fixation at species, regional and global level and lead to a reduction in the apparent oceanic nitrogen imbalance.

**Table 1. Discrepancies observed between <sup>15</sup>N<sub>2</sub> fixation, ARA and carbon fixation or biomass-specific rates<sup>a</sup>.**

| Organism/area                                                     | C <sub>2</sub> H <sub>2</sub> : <sup>15</sup> N <sub>2</sub> | C:N fixation ratio  | biomass-specific rate [d <sup>-1</sup> ] | Reference |
|-------------------------------------------------------------------|--------------------------------------------------------------|---------------------|------------------------------------------|-----------|
| <i>Trichodesmium</i> /Pacific, Atlantic, north of Australia       |                                                              | 808 <sup>b</sup>    |                                          | [30]      |
| cyanobacterial bloom/Baltic                                       | 3–20                                                         |                     |                                          | [18]      |
| <i>Trichodesmium</i> IMS 101                                      | 3–22                                                         | 75–133              |                                          | [17]      |
| <i>Trichodesmium</i> IMS 101                                      | 1.5–6.9                                                      |                     | 0.002–0.011 <sup>c</sup>                 | [16]      |
| <i>Trichodesmium</i> /Gulf of Mexico                              |                                                              | 10–107 <sup>b</sup> |                                          | [31]      |
| <i>Trichodesmium</i> /Bermuda Atlantic Time Series station (BATS) |                                                              | 13–437              | 0.006–0.03 <sup>d</sup>                  | [32]      |

<sup>a</sup>C:N fixation ratio is based on <sup>15</sup>N<sub>2</sub>-fixation measurements.

<sup>b</sup>Ratio calculated from δ<sup>13</sup>C and <sup>15</sup>N<sub>2</sub> fixation rates.

<sup>c</sup>Calculated from <sup>15</sup>N<sub>2</sub> fixation rate divided by PON.

<sup>d</sup>Calculated from doubling time with biomass-specific rate = ln (2)/doubling time.

doi:10.1371/journal.pone.0012583.t001

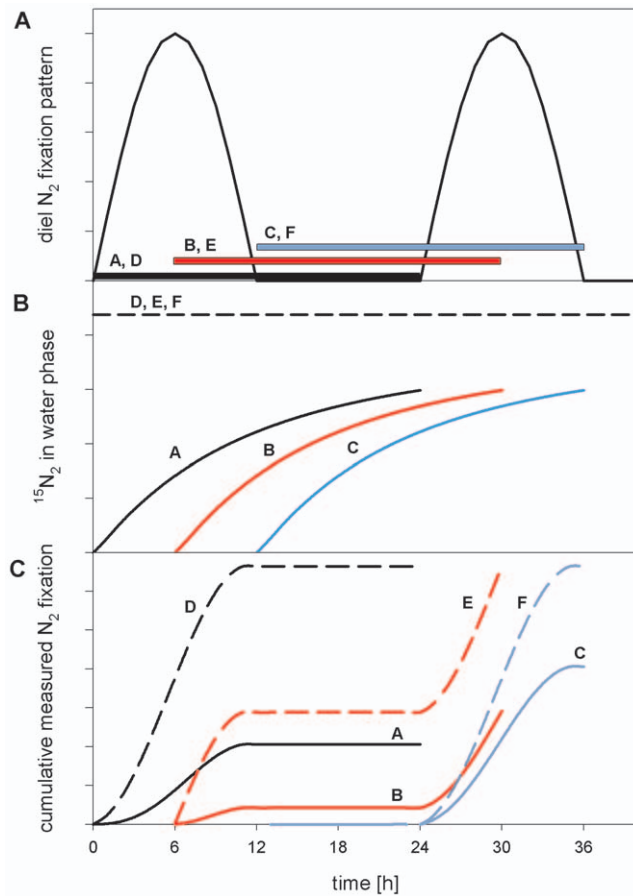

**Figure 5. Influence of diel N<sub>2</sub> fixation patterns on the magnitude of N<sub>2</sub> fixation rates.** Schematic diagram illustrating the influence of diel N<sub>2</sub> fixation patterns on N<sub>2</sub> fixation rates when determined with the direct injection of a <sup>15</sup>N<sub>2</sub> gas bubble. A hypothetical diel N<sub>2</sub> fixation pattern is shown (panel A) with a duration of the N<sub>2</sub>-fixing period of 12 h. Three possible time periods for 24 h incubations are indicated by the solid bars (A–F). The corresponding <sup>15</sup>N enrichment in the dissolved N<sub>2</sub> pool (panel B) is shown for the three incubation periods using the direct injection of a <sup>15</sup>N<sub>2</sub> gas bubble (solid lines; A, B and C) and the addition of <sup>15</sup>N<sub>2</sub>-enriched seawater (dashed line; D, E and F). The resulting cumulative N<sub>2</sub> fixation in each of the incubations (panel C) demonstrates that the timing of the incubation relative to diel N<sub>2</sub> fixation patterns introduces a variable underestimation in the total N<sub>2</sub> fixation rate measured during the incubation after a <sup>15</sup>N<sub>2</sub> gas bubble is injected (solid lines; A, B and C) as compared to the N<sub>2</sub> fixation measured with the addition of <sup>15</sup>N<sub>2</sub>-enriched seawater (dashed lines; D, E and F). The diagram is based on the observations made in the experiments described in this study.

doi:10.1371/journal.pone.0012583.g005

## Materials and Methods

### Culture and growth conditions

The diazotrophic cyanobacterium *Crocospaera watsonii* WH8501 was grown in batch cultures in N-free YBCII media [28] at 28°C in a temperature-controlled growth chamber. *C. watsonii* was subjected to 12:12 h dark:light cycles.

### Direct injection of a <sup>15</sup>N<sub>2</sub> gas bubble in water

We first examined the rate of equilibration between an injected bubble of <sup>15</sup>N<sub>2</sub> gas and seawater. Two series of incubations were started by injecting 140 μl of <sup>15</sup>N<sub>2</sub> into 133 ml of an artificial seawater media (YBCII) contained in headspace-free, septum-

capped glass bottles. In the first series (isotopic equilibration experiments), all bottles were inverted fifty times (~3 min) after injection of the <sup>15</sup>N<sub>2</sub> gas bubble and left at room temperature in the laboratory. One bottle was sampled immediately after the agitation in order to determine how much <sup>15</sup>N<sub>2</sub> gas had dissolved initially. The other bottles were opened and sampled after standing for periods from 1 to 24 h. Upon opening of the bottles, samples to measure the dissolved <sup>15</sup>N<sub>2</sub> were taken and stored in gas-tight glass vials (Exetainer®) until analysis.

In the second series (culture experiments), the YBCII media was pre-heated to 28°C in a temperature-controlled chamber before being used to fill septum-capped glass bottles. As with the first series, samples were agitated and left standing for varying periods of time after the injection of a <sup>15</sup>N<sub>2</sub> gas bubble. Instead of taking subsamples for <sup>15</sup>N<sub>2</sub> analysis, 13 ml of media were replaced by *C. watsonii* WH8501 culture upon opening of the bottles. This series of experiments was timed so that the introduction of culture into the media took place at the start of a dark phase of the 12:12h dark:light-adapted *C. watsonii* culture. The samples with the culture were then incubated for 12 h at culture growth conditions (28°C, dark phase, *i.e.* N<sub>2</sub>-fixing) and filtered onto pre-combusted GF/F (Whatman; 450°C for 4 h) filters at the end of the incubation. Filters were dried immediately after (50°C, 6 h) and stored at room temperature until analysis. To obtain a measure of underestimation using the direct injection of a <sup>15</sup>N<sub>2</sub> gas bubble, one bottle containing 13 ml of *C. watsonii* culture was incubated for 12 h after the injection of 140 μl <sup>15</sup>N<sub>2</sub> gas at the start of the dark phase and without release of the bubble, essentially resembling a laboratory or field incubation.

### Direct addition of <sup>15</sup>N<sub>2</sub> tracer-enriched seawater

An alternative, modified <sup>15</sup>N<sub>2</sub> tracer addition method was developed, which involved addition of an aliquot of <sup>15</sup>N<sub>2</sub>-enriched water to incubations. This alternative method was based on earlier approaches used to study oxygen cycling using <sup>18</sup>O<sub>2</sub> [29] and the release of DON using <sup>15</sup>N<sub>2</sub> [24]. The preparation of the <sup>15</sup>N<sub>2</sub>-enriched water was started by degassing 0.2 μm-filtered artificial seawater (YBCII media). Degassing was carried out by applying vacuum (≤200 mbar absolute pressure) to continuously stirred (stir bar) media for about 30 min. The degassed water was transferred rapidly but gently into septum-capped glass bottles until overflow, and 1 ml of <sup>15</sup>N<sub>2</sub> gas (98 at%; Campro Scientific) was injected per 100 ml of media. The bottles were shaken vigorously until the bubble disappeared. Aliquots of this <sup>15</sup>N<sub>2</sub>-enriched water were then added to the incubation bottles, with the enriched water constituting no more than 10% of the total sample volume. This alternative enrichment method was applied to the two series of experiments described above.

### Assessment of additional factors contributing to variation in <sup>15</sup>N<sub>2</sub> enrichment

We assessed possible effects of varying bottle size, amounts of injected gas and different amounts of agitation on their contribution to the equilibration between a bubble of <sup>15</sup>N<sub>2</sub> gas and the surrounding seawater. For the bottle size comparison, incubations were performed in 0.13 L bottles and in 1.15 L bottles. The amount of injected gas varied between 1 ml <sup>15</sup>N<sub>2</sub> per 1 L seawater up to 8 ml <sup>15</sup>N<sub>2</sub> per 1 L seawater. The incubations were agitated either by inverting fifty times manually (~3 min) or by continuous agitation on a rotating bench-top shaker (Biometra WT 17) at 50 rpm (rotations per minute). We also added marine broth (Difco 2216; 0.2 μm filter-sterilized; 230 mg DOM L<sup>-1</sup> media) to some bottles to examine the effect of dissolved organic matter (DOM).

## <sup>15</sup>N<sub>2</sub> analysis in the artificial seawater and <sup>15</sup>N analysis in the particulate organic nitrogen (PON)

Subsamples taken during the equilibration experiments were analysed for <sup>15</sup>N<sub>2</sub> concentration with a membrane-inlet mass spectrometer (MIMS; GAM200, IPI) within one week of subsampling. Dried GF/F filters were pelletized in tin cups, and PON as well as isotope ratios were measured by means of flash combustion in an elemental analyser (Carlo Erba EA 1108) coupled to a mass spectrometer (Thermo Finnigan Delta S).

### Calculations

The expected concentration of <sup>15</sup>N<sub>2</sub> following bubble injections was calculated assuming rapid and complete isotopic equilibration between bubble and surrounding seawater and considering atmospheric equilibrium concentrations of dissolved N<sub>2</sub> [21]. When <sup>15</sup>N<sub>2</sub>-enriched aliquots were added, the amount of <sup>15</sup>N<sub>2</sub> originally dissolved in the degassed seawater and the volume of the aliquot added were taken into account. The calculations of N<sub>2</sub> fixation rates in the culture incubations were made according to Equation 1 and are presented as a percentage of the highest rate measured. For the comparison between methods, the measured <sup>15</sup>N<sub>2</sub> concentrations are presented as a percentage of the expected concentration calculated as follows

$$\frac{V_{15N_2}}{MV \times V_{TOTAL}} = [mol\ ^{15}N_2\ L^{-1}] \text{ (i.e. 100\%)} \quad (2)$$

for the direct injection of a <sup>15</sup>N<sub>2</sub> gas bubble where  $V_{15N_2}$  is the

volume of the <sup>15</sup>N<sub>2</sub> gas bubble,  $MV$  is the molar volume and  $V_{TOTAL}$  is the total (water) volume of the incubation. The expected concentration was corrected for the amount of <sup>15</sup>N<sub>2</sub> gas which remains in the bubble at isotopic equilibrium with the surrounding water. For the addition of <sup>15</sup>N<sub>2</sub>-enriched water the expected concentration is

$$\frac{V_{15N_2}}{MV \times V_{DG}} \times \frac{V_{EW}}{V_{TOTAL}} = [mol\ ^{15}N_2\ L^{-1}] \text{ (i.e. 100\%)} \quad (3)$$

where  $V_{DG}$  is the volume of degassed water,  $V_{EW}$  is the volume of <sup>15</sup>N<sub>2</sub>-enriched water added to the incubation and  $V_{TOTAL}$  is the total (water) volume of the incubation.

### Acknowledgments

We thank Marcel Kuypers and Hannah Marchant (Max Planck Institute for Marine Microbiology Bremen) for providing access to and advice on the membrane-inlet mass spectrometry. The assistance and suggestions of Gert Petrick and Karen Stange (IFM-GEOMAR) concerning the early analyses of <sup>15</sup>N<sub>2</sub> is also gratefully acknowledged.

### Author Contributions

Conceived and designed the experiments: WM DWRW JL. Performed the experiments: WM. Analyzed the data: WM TG DWRW JL. Wrote the paper: WM. Contributed to figure preparation/schematic diagrams: TG.

### References

- Gruber N (2008) The marine nitrogen cycle: Overview and challenges. In: Capone DG, Bronk DA, Mulholland MR, Carpenter EJ, eds. Nitrogen in the marine environment. Amsterdam, The Netherlands: Elsevier. pp 1–50.
- Karl D, Michaels A, Bergman B, Capone D, Carpenter E, et al. (2002) Dinitrogen fixation in the world's oceans. *Biogeochemistry* 57/58: 47–98.
- Goebel NL, Edwards CA, Church MJ, Zehr JP (2007) Modeled contributions of three diazotrophs to nitrogen fixation at Station ALOHA. *ISME J* 1: 606–619.
- Gruber N, Sarmiento JL (1997) Global patterns of marine nitrogen fixation and denitrification. *Global Biogeochem Cy* 11: 235–266.
- Deutsch C, Sarmiento JL, Sigman DM, Gruber N, Dunne JP (2007) Spatial coupling of nitrogen inputs and losses in the ocean. *Nature* 445: 163–167.
- Montoya JP, Carpenter EJ, Capone DG (2002) Nitrogen fixation and nitrogen isotope abundances in zooplankton of the oligotrophic North Atlantic. *Limnol Oceanogr* 47: 1617–1628.
- Montoya JP, Voss M, Kähler P, Capone DG (1996) A simple, high-precision, high-sensitivity tracer assay for N<sub>2</sub> fixation. *Appl Environ Microbiol* 62: 986–993.
- Capone DG, Montoya JP (2001) Nitrogen fixation and denitrification. In: Paul J, ed. *Methods in Microbiology*, Volume 30. London, UK: Academic Press. pp 501–515.
- Capone DG (1993) Determination of nitrogenase activity in aquatic samples using the acetylene reduction procedure. In: Kemp PF, Sherr BF, Sherr EB, Cole JJ, eds. *Handbook of Methods in Aquatic Microbial Ecology*. Boca Raton, FL, USA: Lewis Publishers. pp 621–631.
- Mahaffey C, Michaels AF, Capone DG (2005) The conundrum of marine N<sub>2</sub> fixation. *Am J Sci* 305(SD): 546–595.
- Codispoti LA, Brandes JA, Christensen JP, Devol AH, Naqvi SWA, et al. (2001) The oceanic fixed nitrogen and nitrous oxide budgets: Moving targets as we enter the anthropocene? *Sci Mar* 65: 85–105.
- Codispoti LA (2007) An oceanic fixed nitrogen sink exceeding 400 Tg N a<sup>-1</sup> vs the concept of homeostasis in the fixed-nitrogen inventory. *Biogeosciences* 4: 233–253.
- Brandes JA, Devol AH (2002) A global marine-fixed nitrogen isotopic budget: Implications for Holocene nitrogen cycling. *Global Biogeochem Cy* 16: 1120. doi:10.1029/2001GB001856.
- Altabet MA (2007) Constraints on oceanic N balance/imbalance from sedimentary N-15 records. *Biogeosciences* 4: 75–86.
- Mulholland MR (2007) The fate of nitrogen fixed by diazotrophs in the ocean. *Biogeosciences* 4: 37–51.
- Mulholland MR, Bronk DA, Capone DG (2004) Dinitrogen fixation and release of ammonium and dissolved organic nitrogen by *Trichodesmium* IMS 101. *Aquat Microb Ecol* 37: 85–94.
- Mulholland MR, Bernhardt PW (2005) The effect of growth rate, phosphorus concentration, and temperature on N<sub>2</sub> fixation, carbon fixation, and nitrogen release in continuous culture of *Trichodesmium* IMS 101. *Limnol Oceanogr* 50: 839–849.
- Gallon JR, Evans AM, Jones DA, Albertano P, Congesti R, et al. (2002) Maximum rates of N<sub>2</sub> fixation and primary production are out of phase in a developing cyanobacterial bloom in the Baltic Sea. *Limnol Oceanogr* 47: 1514–1521.
- Zehr JP, Montoya JP (2007) Measuring N<sub>2</sub> fixation in the field. In: Bothe H, Ferguson SJ, Newton WE, eds. *Biology of the nitrogen cycle*. Amsterdam, The Netherlands: Elsevier. pp 193–205.
- Weiss RF (1970) The solubility of nitrogen, oxygen and argon in water and seawater. *Deep-Sea Res* 17: 721–735.
- Hamme RC, Emerson SR (2004) The solubility of neon, nitrogen and argon in distilled water and seawater. *Deep-Sea Research I* 51: 1517–1528.
- Frew NM (1997) The role of organic films in air-sea gas exchange. In: Liss PS, Duce RA, eds. *The sea surface and global change*. Cambridge, UK: Cambridge University Press. pp 121–172.
- Asher WE, Pankow JF (1991) Prediction of gas/water mass transport coefficients by a surface renewal model. *Environ Sci Technol* 25: 1294–1300.
- Glibert PM, Bronk DA (1994) Release of dissolved organic nitrogen by marine diazotrophic cyanobacteria, *Trichodesmium* spp. *Appl Environ Microb* 60: 3996–4000.
- Colón-López M, Sherman DM, Sherman LA (1997) Transcriptional and translational regulation of nitrogenase in light-dark- and continuous-light grown cultures of the unicellular cyanobacterium *Cyanothece* sp. strain ATCC 51142. *J Bacteriol* 13: 4319–4327.
- Chen YB, Dominic B, Mellon MT, Zehr JP (1998) Circadian rhythm of nitrogenase gene expression in the diazotrophic filamentous nonheterocystous cyanobacterium *Trichodesmium* sp. strain IMS 101. *J Bacteriol* 180: 3598–3605.
- Mohr W, Internaggio MP, LaRoche J (2010) Diel rhythm of nitrogen and carbon metabolism in the unicellular, diazotrophic cyanobacterium *Crocospaera walsbyi* WH8501. *Environ Microbiol* 12: 412–421.
- Chen YB, Zehr JP, Mellon M (1996) Growth and nitrogen fixation of the diazotrophic filamentous nonheterocystous cyanobacterium *Trichodesmium* sp. IMS 101 in defined media: Evidence for a circadian rhythm. *J Phycol* 32: 916–923.
- Kana T (1990) Light-dependent oxygen cycling measured by an oxygen-18 isotope dilution technique. *Mar Ecol Prog Ser* 64: 293–300.
- Burns JA, Zehr JP, Montoya JP, Kustka AB, Capone DG (2006) Effect of EDTA additions on natural *Trichodesmium* spp. (Cyanophyta) populations. *J Phycol* 42: 900–904.

31. Mulholland MR, Bernhardt PW, Heil CA, Bronk DA, O'Neil JM (2006) Nitrogen fixation and release of fixed nitrogen by *Trichodesmium* spp. in the Gulf of Mexico. *Limnol Oceanogr* 51: 1762–1776.
32. Orcutt KM, Lipschultz F, Gundersen K, Arimoto R, Michaels AF, et al. (2001) A seasonal study of the significance of N<sub>2</sub> fixation by *Trichodesmium* spp. at the Bermuda Atlantic Time-Series study (BATS) site. *Deep-Sea Res Pt 2* 48: 1583–1608.
